# Supplementary material for: Developing physiotherapy student safety skills in readiness for clinical placement using standardised patients compared with peer-role play: a pilot non-randomised controlled trial
Source: PubMed Central journal article supplement (PMC5553918; doi:10.1186/s12909-017-0973-5), 2017-08-10
Supplement: 12909_2017_973_MOESM1_ESM.pdf [file 12909_2017_973_MOESM1_ESM.pdf]

## Clinical educator feedback checklist for key learning objectives

| <b>Debrief checklist</b>                                                                                                                                                  |                                                                                                          |
|---------------------------------------------------------------------------------------------------------------------------------------------------------------------------|----------------------------------------------------------------------------------------------------------|
| <b>Specific Assessments</b>                                                                                                                                               |                                                                                                          |
| <b>1. Familiarisation with attachments</b>                                                                                                                                |                                                                                                          |
| <input type="checkbox"/> Identified the four patient attachments prior to commencing mobilisation                                                                         |                                                                                                          |
| <input type="checkbox"/> Prepared attachments for mobilisation (e.g. rolled TED's up, untangled IV line/NS, moved IVT in direction of transfer)                           |                                                                                                          |
| <input type="checkbox"/> Managed attachments safely and appropriately throughout session                                                                                  |                                                                                                          |
| <b>2. Planning of mobilisation task</b>                                                                                                                                   |                                                                                                          |
| <b>Assessment of patient capacity to complete transfer</b>                                                                                                                |                                                                                                          |
| <input type="checkbox"/> Checked patient pain control is adequate                                                                                                         |                                                                                                          |
| <input type="checkbox"/> Checked strength                                                                                                                                 | <input type="checkbox"/> legs <input type="checkbox"/> arms <input type="checkbox"/> trunk               |
| <b>Set up of physical environment for safe transfer</b>                                                                                                                   |                                                                                                          |
| <input type="checkbox"/> Suitable bed height                                                                                                                              |                                                                                                          |
| <input type="checkbox"/> Bed brakes on                                                                                                                                    |                                                                                                          |
| <input type="checkbox"/> TED's rolled up or non-slip socks/footwear on                                                                                                    |                                                                                                          |
| <input type="checkbox"/> Walking frame ready and adjusted                                                                                                                 |                                                                                                          |
| <b>Communication with patient and assistant</b>                                                                                                                           |                                                                                                          |
| <input type="checkbox"/> Assistant briefed and ready for mobilisation                                                                                                     |                                                                                                          |
| <input type="checkbox"/> Patient informed and consented to mobilisation task                                                                                              |                                                                                                          |
| <b>3. Actual mobilisation task</b>                                                                                                                                        |                                                                                                          |
| Safe and effective mobilisation                                                                                                                                           |                                                                                                          |
| <input type="checkbox"/> Positioned self, and assistant/s close enough to be able to support patient if they lose balance                                                 |                                                                                                          |
| <input type="checkbox"/> Clear instructions to patient and assistant                                                                                                      |                                                                                                          |
| <input type="checkbox"/> Protected patients IV line, catheter, nasal specs whilst transferring and ambulating                                                             |                                                                                                          |
| <input type="checkbox"/> Completed mobility task:                                                                                                                         | <input type="checkbox"/> SOEB <input type="checkbox"/> SOOB in chair <input type="checkbox"/> Ambulation |
| <b>4. Reflection of performance</b>                                                                                                                                       |                                                                                                          |
| <input type="checkbox"/> Able to identify what was done well                                                                                                              |                                                                                                          |
| <input type="checkbox"/> Able to identify areas for improvement                                                                                                           |                                                                                                          |
| <input type="checkbox"/> Strategies discussed for subsequent task/s where relevant                                                                                        |                                                                                                          |
| <input type="checkbox"/> Peer review completed                                                                                                                            |                                                                                                          |
| <i>Overall feedback : Consider both professional behaviour and safety as either satisfactory or unsatisfactory, when the full performance of task has been considered</i> |                                                                                                          |
| <b>Professional behaviour</b> (e.g. appearance, introduction to patient)                                                                                                  | <input type="checkbox"/> <b>satisfactory</b> / <input type="checkbox"/> <b>unsatisfactory</b>            |
| <b>Safety</b>                                                                                                                                                             | <input type="checkbox"/> <b>satisfactory</b> / <input type="checkbox"/> <b>unsatisfactory</b>            |

| <b>Learning objectives</b> |                                                                                                                                                                                                                                                                                                                                                                                                                                                                                                                                                                 |
|----------------------------|-----------------------------------------------------------------------------------------------------------------------------------------------------------------------------------------------------------------------------------------------------------------------------------------------------------------------------------------------------------------------------------------------------------------------------------------------------------------------------------------------------------------------------------------------------------------|
| 1.                         | <b>Demonstrate familiarisation</b> with the patient attachments of IVT, Nasal specs, IDC, TED's                                                                                                                                                                                                                                                                                                                                                                                                                                                                 |
| 2.                         | <b>Demonstrate the ability to planning</b> the necessary procedures to enable the safe and effective transfer / mobilisation task (SOOB-stand-walking) Including: <ul style="list-style-type: none"> <li>• Preparation of physical environment and assessment of patient for safe transfer</li> <li>• Communication to reassure patient and explanation planned mobility task</li> <li>• Communication to assistant/s to ensure safe and effective mobility task</li> <li>• Management of patient attachments safely throughout entire mobility task</li> </ul> |
| 3.                         | <b>Demonstrate safe and effective mobilisation of patient WBAT</b><br>Practice of procedures involved with assisting patient transfer / mobilisation task (SOOB-stand-walking)                                                                                                                                                                                                                                                                                                                                                                                  |
| 4.                         | <b>Be able to reflect</b> on performance during execution of the procedures (self-reflection and peer assessment)                                                                                                                                                                                                                                                                                                                                                                                                                                               |
