# Supplementary material for: Developing physiotherapy student safety skills in readiness for clinical placement using standardised patients compared with peer-role play: a pilot non-randomised controlled trial
Source: PubMed Central journal article supplement (PMC5553918; doi:10.1186/s12909-017-0973-5), 2017-08-10
Supplement: 12909_2017_973_MOESM3_ESM.pdf [file 12909_2017_973_MOESM3_ESM.pdf]

|      | SP 1<br>Educator A                                                                 | Debrief<br>Self/peer                            | SP 2<br>Educator B | Debrief<br>Self/peer                           | SP 3<br>Educator C | Debrief<br>Self/peer                           | SP 4<br>Educator D | Debrief<br>Self/peer                           | SP 5<br>Educator E | Debrief<br>Self/peer                           |
|------|------------------------------------------------------------------------------------|-------------------------------------------------|--------------------|------------------------------------------------|--------------------|------------------------------------------------|--------------------|------------------------------------------------|--------------------|------------------------------------------------|
| 8    | intro, pre-workshop questionnaire and prep for all including in C7 20/21 (30 mins) |                                                 |                    |                                                |                    |                                                |                    |                                                |                    |                                                |
| 830  | 1A & 2A                                                                            |                                                 | 1B & 2B            |                                                | 1C & 2C            |                                                | 1D & 2D            |                                                | 1E & 2E            |                                                |
| 845  | 3A & 4A                                                                            |                                                 | 3B & 4B            |                                                | 3C & 4C            |                                                | 3D & 4D            |                                                | 3E & 4E            |                                                |
| 9    | 5A & 6A                                                                            | 1 <sup>st</sup> feedback<br>1A,2A,3A,4A         | 5B & 6B            | 1 <sup>st</sup> debrief<br>1B,2B,3B,4B         | 5C & 6C            | 1 <sup>st</sup> debrief<br>1C,2C,3C,4C         | 5D & 6D            | 1 <sup>st</sup> debrief<br>1D,2D,3D,4D         | 5E & 6E            | 1 <sup>st</sup> debrief<br>1E,2E,3E,4E         |
| 915  | 7A & 8A                                                                            |                                                 | 7B & 8B            |                                                | 7C & 8C            |                                                | 7D & 8D            |                                                | 7E & 8E            |                                                |
| 930* | 4A & 3A                                                                            | 1 <sup>st</sup> feedback<br>5A,6A,7A,8A         | 4B & 3B            | 1 <sup>st</sup> debrief<br>5B,6B,7B, 8B        | 4C & 3C            | 1 <sup>st</sup> debrief<br>5C,6C,7C,8C         | 4D & 3D            | 1 <sup>st</sup> debrief<br>5D,6D,7D,8D         | 4E & 3E            | 1 <sup>st</sup> debrief<br>5E,6E,7E,8E         |
| 945  | 2A & 1A                                                                            |                                                 | 2B & 1B            |                                                | 2C & 1C            |                                                | 2D & 1D            |                                                | 2E & 1E            |                                                |
| 10   | 8A & 7A                                                                            | Final feedback,<br>questionnaire<br>1A,2A,3A,4A | 8B & 7B            | Final debrief,<br>questionnaire<br>1B,2B,3B,4B | 8C & 7C            | Final debrief,<br>questionnaire<br>1C,2C,3C,4C | 8D & 7D            | Final debrief,<br>questionnaire<br>1D,2D,3D,4D | 8E & 7E            | Final debrief,<br>questionnaire<br>1E,2E,3E,4E |
| 1015 | 6A & 5A                                                                            |                                                 | 6B & 5B            |                                                | 6C & 5C            |                                                | 6D & 5D            |                                                | 6E & 5E            |                                                |
| 1030 |                                                                                    | Final feedback,<br>questionnaire<br>5A,6A,7A,8A |                    | Final debrief,<br>questionnaire<br>5A,6B,7B,8B |                    | Final debrief,<br>questionnaire<br>5C,6C,7C,8C |                    | Final debrief,<br>questionnaire<br>5D,6D,7D,8D |                    | Final debrief,<br>questionnaire<br>5E,6E,7E,8E |
| 1045 |                                                                                    |                                                 |                    |                                                |                    |                                                |                    |                                                |                    |                                                |

|       | SP 1<br>Educator A                                                                 | Debrief<br>Self/peer                            | SP 2<br>Educator B | Debrief<br>Self/peer                           | SP 3<br>Educator C | Debrief<br>Self/peer                           | SP 4<br>Educator D | Debrief<br>Self/peer                           | SP 5<br>Educator E | Debrief<br>Self/peer                           |
|-------|------------------------------------------------------------------------------------|-------------------------------------------------|--------------------|------------------------------------------------|--------------------|------------------------------------------------|--------------------|------------------------------------------------|--------------------|------------------------------------------------|
| 2:00  | intro, pre-workshop questionnaire and prep for all including in C7 20/21 (30 mins) |                                                 |                    |                                                |                    |                                                |                    |                                                |                    |                                                |
| 2:30  | 1A & 2A                                                                            |                                                 | 1B & 2B            |                                                | 1C & 2C            |                                                | 1D & 2D            |                                                | 1E & 2E            |                                                |
| 2:45  | 3A & 4A                                                                            |                                                 | 3B & 4B            |                                                | 3C & 4C            |                                                | 3D & 4D            |                                                | 3E & 4E            |                                                |
| 3:00  | 5A & 6A                                                                            | 1 <sup>st</sup> feedback<br>1A,2A,3A,4A         | 5B & 6B            | 1 <sup>st</sup> debrief<br>1B,2B,3B,4B         | 5C & 6C            | 1 <sup>st</sup> debrief<br>1C,2C,3C,4C         | 5D & 6D            | 1 <sup>st</sup> debrief<br>1D,2D,3D,4D         | 5E & 6E            | 1 <sup>st</sup> debrief<br>1E,2E,3E,4E         |
| 3:15  | 7A & 8A                                                                            |                                                 | 7B & 8B            |                                                | 7C & 8C            |                                                | 7D & 8D            |                                                | 7E & 8E            |                                                |
| 3:30* | 4A & 3A                                                                            | 1 <sup>st</sup> feedback<br>5A,6A,7A,8A         | 4B & 3B            | 1 <sup>st</sup> debrief<br>5B,6B,7B, 8B        | 4C & 3C            | 1 <sup>st</sup> debrief<br>5C,6C,7C,8C         | 4D & 3D            | 1 <sup>st</sup> debrief<br>5D,6D,7D,8D         | 4E & 3E            | 1 <sup>st</sup> debrief<br>5E,6E,7E,8E         |
| 3:45  | 2A & 1A                                                                            |                                                 | 2B & 1B            |                                                | 2C & 1C            |                                                | 2D & 1D            |                                                | 2E & 1E            |                                                |
| 4:00  | 8A & 7A                                                                            | Final feedback,<br>questionnaire<br>1A,2A,3A,4A | 8B & 7B            | Final debrief,<br>questionnaire<br>1B,2B,3B,4B | 8C & 7C            | Final debrief,<br>questionnaire<br>1C,2C,3C,4C | 8D & 7D            | Final debrief,<br>questionnaire<br>1D,2D,3D,4D | 8E & 7E            | Final debrief,<br>questionnaire<br>1E,2E,3E,4E |
| 4:15  | 6A & 5A                                                                            |                                                 | 6B & 5B            |                                                | 6C & 5C            |                                                | 6D & 5D            |                                                | 6E & 5E            |                                                |
| 4:30  |                                                                                    | Final feedback,<br>questionnaire<br>5A,6A,7A,8A |                    | Final debrief,<br>questionnaire<br>5A,6B,7B,8B |                    | Final debrief,<br>questionnaire<br>5C,6C,7C,8C |                    | Final debrief,<br>questionnaire<br>5D,6D,7D,8D |                    | Final debrief,<br>questionnaire<br>5E,6E,7E,8E |
| 4:45  |                                                                                    |                                                 |                    |                                                |                    |                                                |                    |                                                |                    |                                                |

**\*To enable an element of surprise in Encounter 2 the patient will become dizzy / nauseous / wobbly when SOEB, and if not addressed will "faint" safely backwards onto bed / feign vomiting / become wobbly and unsteady on feet but will not fall**

SP standardised patient
