# Supplementary material for: Developing physiotherapy student safety skills in readiness for clinical placement using standardised patients compared with peer-role play: a pilot non-randomised controlled trial
Source: PubMed Central journal article supplement (PMC5553918; doi:10.1186/s12909-017-0973-5), 2017-08-10
Supplement: 12909_2017_973_MOESM5_ESM.pdf [file 12909_2017_973_MOESM5_ESM.pdf]

SUNDANCE Jill  
DOB 21-8-1940  
3 Orange Drive Fullarton SA 5063  
Consultant: Dr Riggs

**75 year old female admitted to the Fullarton Hospital on 12-5-15 following a fall at home sustaining a fractured right neck of femur (NOF).**

**Surgical management:** 12-5-15 open reduction and internal fixation (ORIF) with a dynamic hip screw.

**Post-op orders:** weight bearing as tolerated (WBAT)

**PMHx:** no serious health problems, no previous falls.

**Previous mobility:** independent using a walking stick.

**Post op progress:** observations have been stable and her pain has been managed with oral tablets which she last took 30 minutes ago and will be at their peak effectiveness now.

**Attachments:** (pictures of the patient attachments are provided over the page)

- 2L/min oxygen via nasal prongs
- Indwelling urinary catheter (IDC)
- Intravenous line (IV) inserted into elbow (cubital fossa)
- Thrombo-embolic deterrent stockings (TED)

## Patient attachments

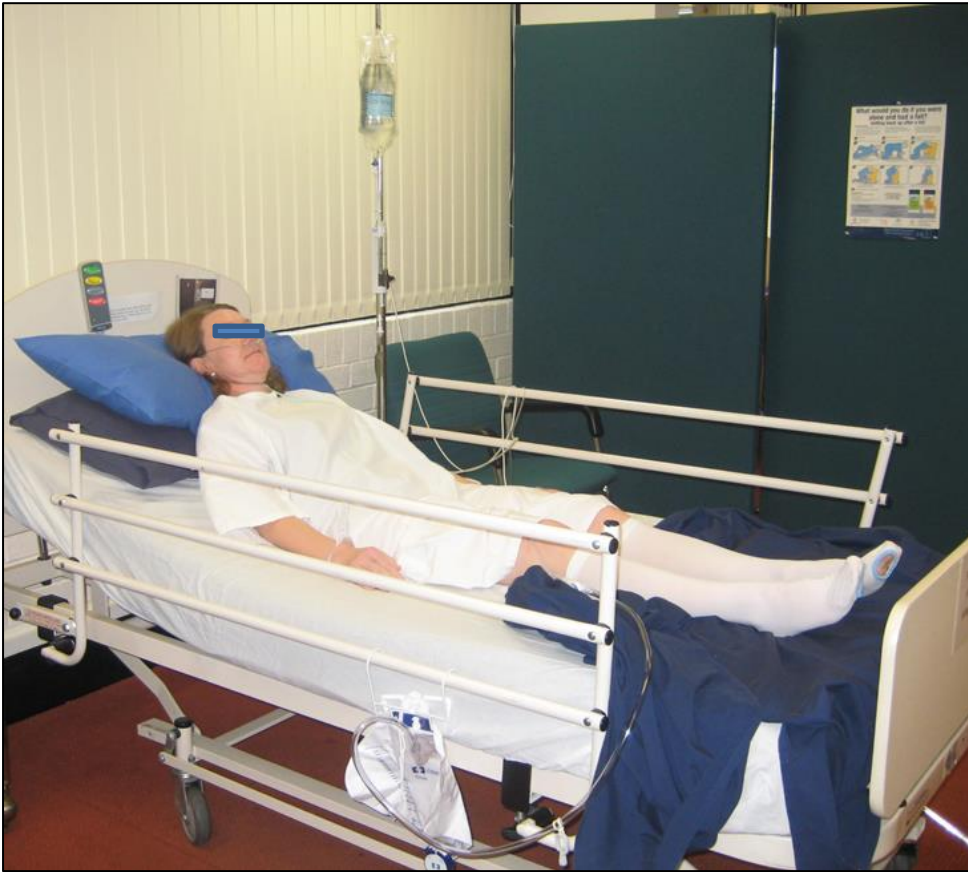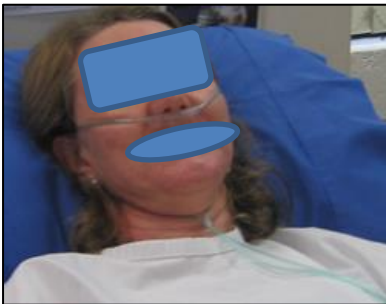

Nasal prongs

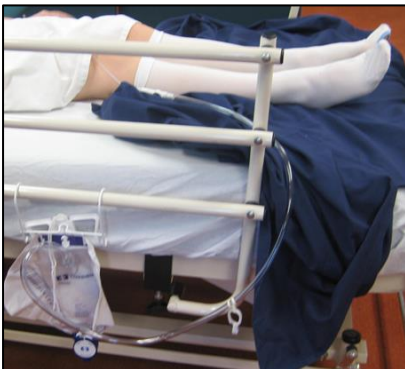

IDC and TED

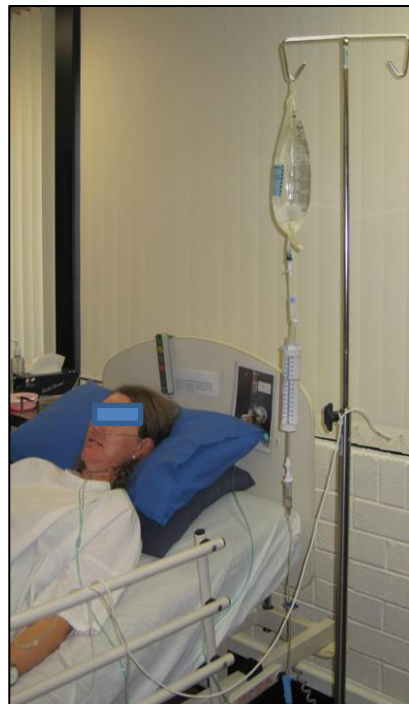

IV
